# Supplementary material
Source: Royal Society of Chemistry journal article supplement (doi:10.1039/d6re00086j)
Supplement: d6re00086j1.pdf [file d6re00086j1.pdf]

# Unprecedented promotion of NH<sub>3</sub> decomposition over Ru via H<sub>2</sub>-scavenging: a chemical reaction engineering analysis

Yi Qiu,<sup>[a]</sup> Ivan Conti,<sup>[a]</sup> Enrico Berretti<sup>[b]</sup> and Alessandra Beretta\*<sup>[a]</sup>

[a] Y. Qiu, I. Conti, Prof. A. Beretta  
Laboratory of Catalysis and Catalytic Processes  
Department of Energy, Politecnico di Milano  
via La Masa 34, 20156 Milano  
E-mail: alessandra.beretta@polimi.it

[b] E. Berretti  
Italian National Research Council (CNR) –  
Institute of Chemistry of OrganoMetallic Compounds (ICCOM)  
Via Madonna Del Piano 10, 50019 Sesto Fiorentino, Florence

## Quantitative comparison between the cases of H<sub>2</sub>-inhibited and H<sub>2</sub>-scavenged kinetics

It is herein reported that the modelling analysis compares the predicted performance of a conventional packed bed reactor operating at GHSV = 20,000 NI/kg<sub>cat</sub>/h for three different cases of feed composition: 1%NH<sub>3</sub> in He, 10%NH<sub>3</sub> in He, pure NH<sub>3</sub>. To quantify the promotion in terms of equivalent rate constant, each curve obtained by the H<sub>2</sub>-inhibited kinetics was fitted by a pseudo-first order kinetics:

$$r = k_{app}(T) \cdot P_{NH_3} \quad (\text{Eq. S1})$$

$$k_{app}(T) = k_{app}(600\text{ K}) \cdot \exp\left(-\frac{E_{act}}{R} \left(\frac{1}{T} - \frac{1}{600\text{ K}}\right)\right) \quad (\text{Eq. S2})$$

**Table S1** Estimation of  $k_{app}$  at 250°C and the ratio of the ideal  $k_{no\ inhibition}$  to the  $k_{app}$  in real cases

| Condition            | $k_{app}$ (250 °C) [mol·atm <sup>0.5</sup> /s/g <sub>cat</sub> /] | $k_{no\ inhibition} / k_{app}$ |
|----------------------|-------------------------------------------------------------------|--------------------------------|
| No inhibition        | 3.58 E-4                                                          | /                              |
| 1% NH <sub>3</sub>   | 2.55 E-5                                                          | 14                             |
| 10% NH <sub>3</sub>  | 6.28 E-6                                                          | 57                             |
| 100% NH <sub>3</sub> | 5.66 E-7                                                          | 633                            |

## Temperature in catalyst bed vs. setpoint of the furnace in O<sub>2</sub>-cofeed experiments

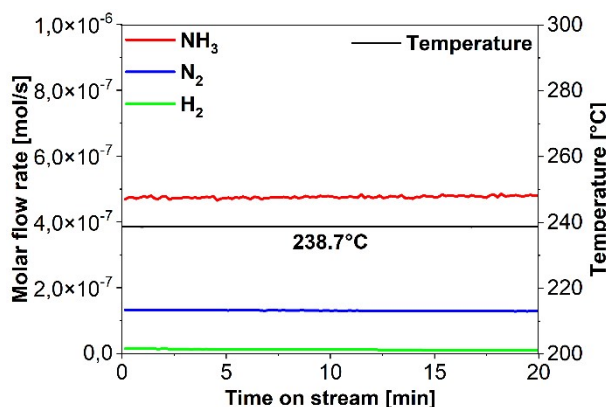

**Fig. S1** Molar flow rate of NH<sub>3</sub>, H<sub>2</sub>, N<sub>2</sub> and temperature along time on stream for 1%NH<sub>3</sub>+0.25%O<sub>2</sub> with oven setpoint at 238°C,

Taking 1%NH<sub>3</sub>+0.25%O<sub>2</sub> as an example, Fig. S1 illustrates that the temperature increase due to the exothermic H<sub>2</sub> oxidation is negligible in the studied cases.

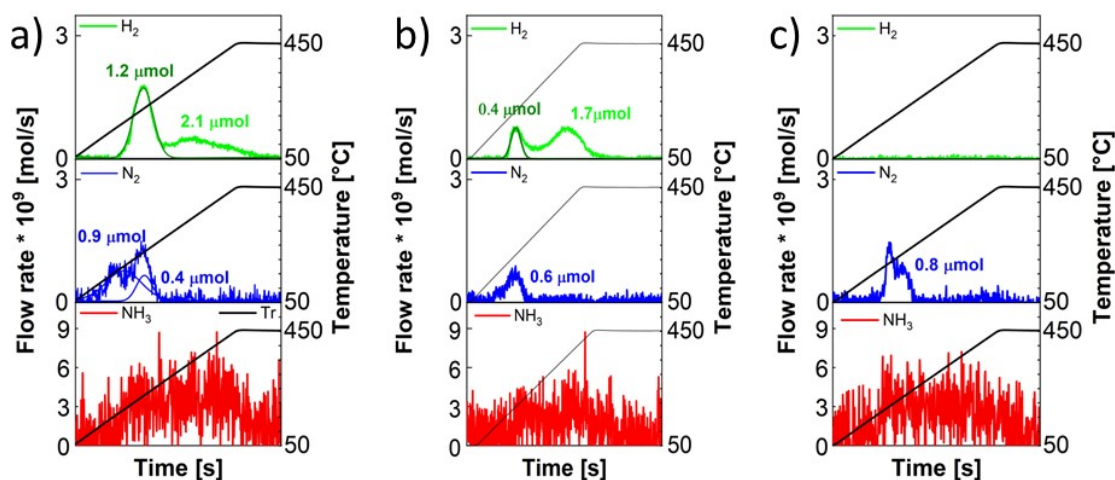

**Fig. S2** Molar fractions of NH<sub>3</sub>, H<sub>2</sub>, N<sub>2</sub> and temperature along time stream during He-TPD for a) 1%NH<sub>3</sub> at 250°C; b) 1%NH<sub>3</sub> at 320°C, c) 1%NH<sub>3</sub>+0.25%O<sub>2</sub> at 250°C

Fig. S2a presents the species observed during He-TPD over the catalyst pretreated with 1% NH<sub>3</sub> at 250 °C (corresponding to ~10% NH<sub>3</sub> conversion). The H<sub>2</sub> signal is accompanied by N<sub>2</sub> and residual NH<sub>3</sub>. Both the H<sub>2</sub> and N<sub>2</sub> profiles comprise two peaks. After deconvoluting and quantifying them separately, it is found that the first H<sub>2</sub> peak and the second N<sub>2</sub> peak emerge at the same temperature and exhibit an H<sub>2</sub>/N<sub>2</sub> ratio of 3, consistent with the stoichiometric requirements of NH<sub>3</sub> decomposition; these features are therefore assigned to NH<sub>3</sub> that undergoes decomposition during the temperature ramp. In contrast, the first N<sub>2</sub> peak and the trailing segment of the H<sub>2</sub> profile are attributed to desorption of surface-bound species. These observations indicate the presence of N\*, H\*, and NH<sub>3</sub>\* species on the catalyst surface at 250 °C. It is further noteworthy that hydrogen is strongly retained on the surface, as evidenced by its continuous desorption signal up to 450 °C.

Fig. S2b reports the desorption profiles obtained after 1% NH<sub>3</sub> adsorption at 320 °C (~ 60% NH<sub>3</sub> conversion). The hydrogen signal again comprises two contributions; however, the low-temperature nitrogen shoulder observed at 250 °C is nearly absent. Only a single N<sub>2</sub> peak remains, appearing at the same temperature as the first H<sub>2</sub> peak. Because the measured H<sub>2</sub>/N<sub>2</sub> ratio is lower than the stoichiometric value of 3 expected for complete NH<sub>3</sub> decomposition, this feature is more plausibly assigned to the release of NH<sub>x</sub> surface intermediates rather than full NH<sub>3</sub> dissociation during the temperature ramp. Under these conditions, the catalyst surface is therefore predominantly populated by H\* and NH<sub>3</sub>\* species.

Fig. S2c shows the desorbing species after adsorption of 1% NH<sub>3</sub> + 0.25% O<sub>2</sub> at 250 °C (~ 70% NH<sub>3</sub> conversion). In this case, hydrogen is not detected, while small amounts of nitrogen and ammonia are still present. And the nitrogen profile consists of two contributions: the first can be attributed to surface nitrogen species, and the second to reacted NH<sub>3</sub>. Thus, the surface species here are essentially the same as in the case without O<sub>2</sub> cofeeding at 250°C but with H\* effectively removed by O<sub>2</sub>.
